# Supplementary material for: Removal of SO2by a mixture of caprolactam tetrabutyl ammonium bromide ionic liquid and sodium humate solution
Source: Royal Society of Chemistry journal article supplement (doi:10.1039/c2ra22600f), 2012-12-04
Supplement: c2ra22600f.pdf [file c2ra22600f.pdf]

## Supporting Information

Removal of SO<sub>2</sub> by a Mixture of Caprolactam Tetrabutyl Ammonium Bromide Ionic Liquid and  
Sodium Humate Solution

Yu Zhao, Guoxin Hu\*

School of Mechanical and Power Engineering, Shanghai Jiaotong University, Shanghai 200240, China

\* Corresponding author phone/fax: +86-21-34206569; E-mail: hugx@sjtu.edu.cn.

Summary:

Page S2: Figure S1

Page S2: Figure S2

Page S3: Figure S3

Page S3: Figure S4

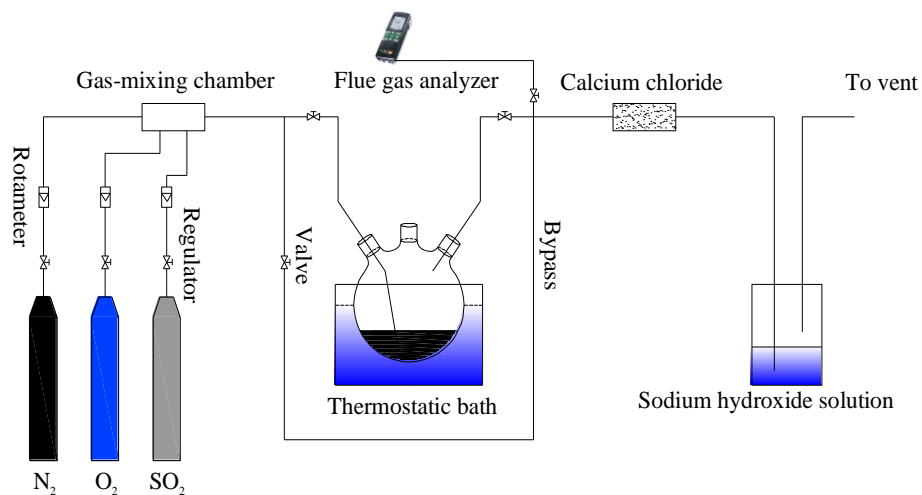

Fig.S1 Schematic of the experimental apparatus

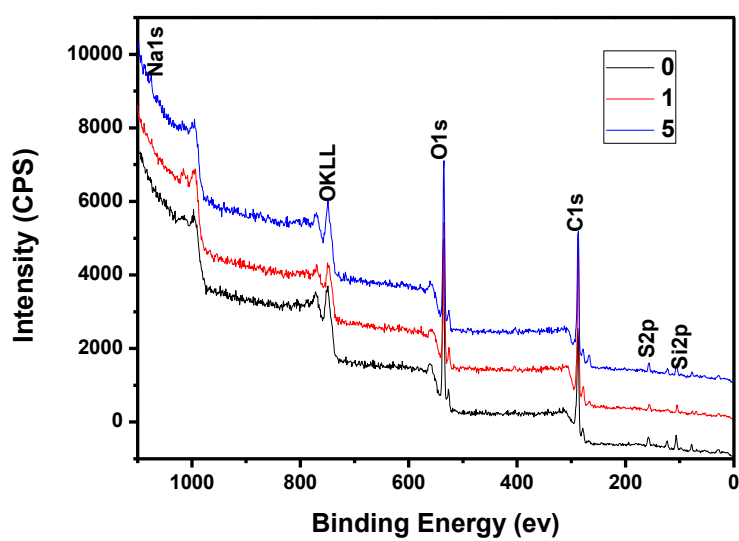

Fig.S2 XPS survey spectra of desulfurization products.

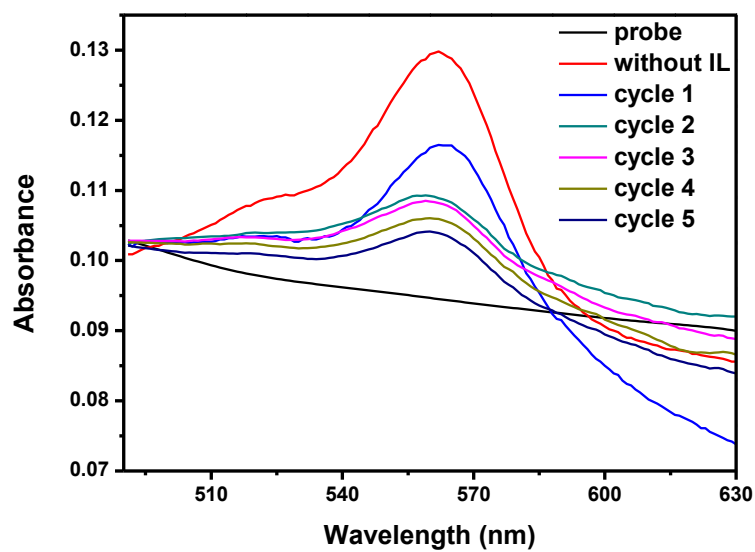

**Fig.S3** The absorption spectra of rhodamine-based fluorescent probe ( $50\mu\text{molL}^{-1}$ ) in water-ethanol (90/10, v/v) buffered at pH4.8 upon mixing with desulfurization supernatant before and after absorbing  $\text{SO}_2$ .

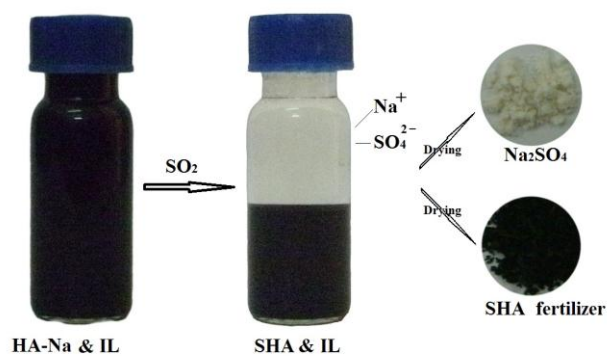

**Fig.S4** The Photo of A. HA-Na & IL solution; B. desulfurization liquid; C. SHA compound fertilizer; and D.  $\text{Na}_2\text{SO}_4$ .
